# Supplementary material for: Multi-level flash memory device based on stacked anisotropic ReS2–boron nitride–graphene heterostructures
Source: Royal Society of Chemistry journal article supplement (doi:10.1039/d0nr03965a), 2020-01-01
Supplement: d0nr03965a1.pdf [file d0nr03965a1.pdf]

**Supplementary Information for**  
**Multiple-level Flash Memory Based on Stacked Anisotropic ReS<sub>2</sub>-Boron Nitride-**  
**Graphene Heterostructures**

**Enxiu Wu<sup>1\*</sup>, Yuan Xie<sup>1</sup>, Shijie Wang<sup>1</sup>, Daihua Zhang<sup>1</sup>, Xiaodong Hu<sup>1\*</sup> and Jing**  
**Liu<sup>1\*</sup>**

<sup>1</sup>State Key Laboratory of Precision Measurement Technology and Instruments,  
School of Precision Instruments and Opto-electronics Engineering, Tianjin  
University, No. 92 Weijin Road, Tianjin, 300072, China  
E-mails: enxiuwu@tju.edu.cn, xdhu@tju.edu.cn, jingliu\_1112@tju.edu.cn

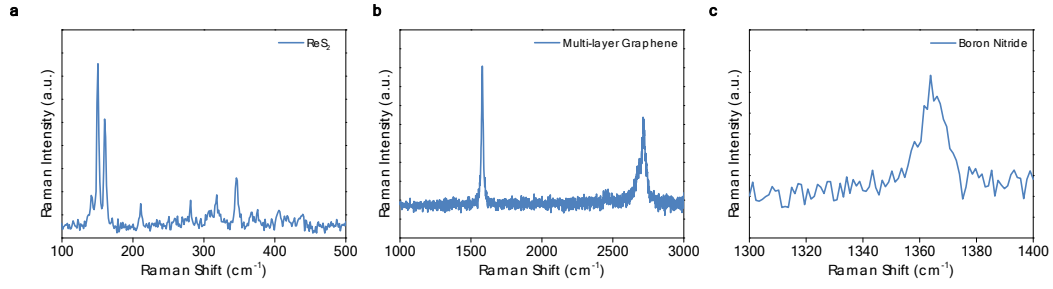

Figure S1. Raman spectra of the ReS<sub>2</sub> flake (a), graphene flake (b) and h-BN flake (c). The Raman spectrum in Figure S1 confirms the lattice structures of all three layers. The three peaks at 140.7, 154.7, 163.5, 215.0 and 237.5 cm<sup>-1</sup> are characteristic peaks of ReS<sub>2</sub>. The two peaks at 1581 and 2723 cm<sup>-1</sup> characterize multi-layer graphene, and the peak at 1363 cm<sup>-1</sup> originates from longitudinal mode phonons in h-BN.

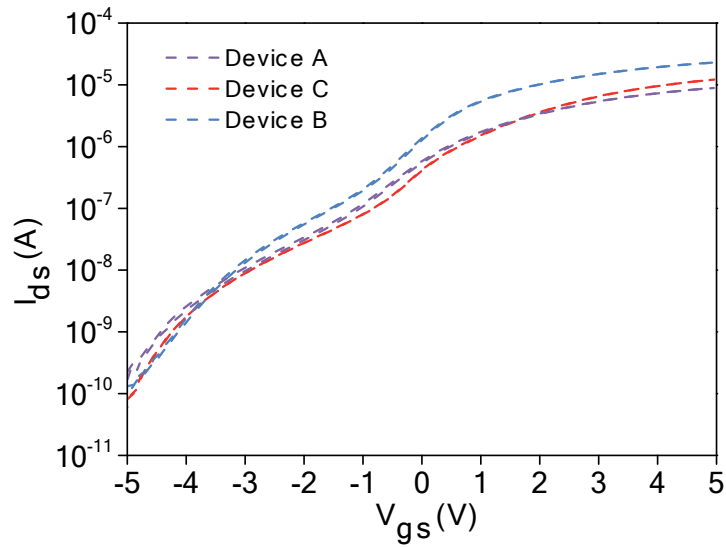

Figure S2. Transfer characteristics of Device A, B and C in semi-log scale with the local graphene gate sweeping back and forth between -5 V and +5 V, showing no hysteresis.

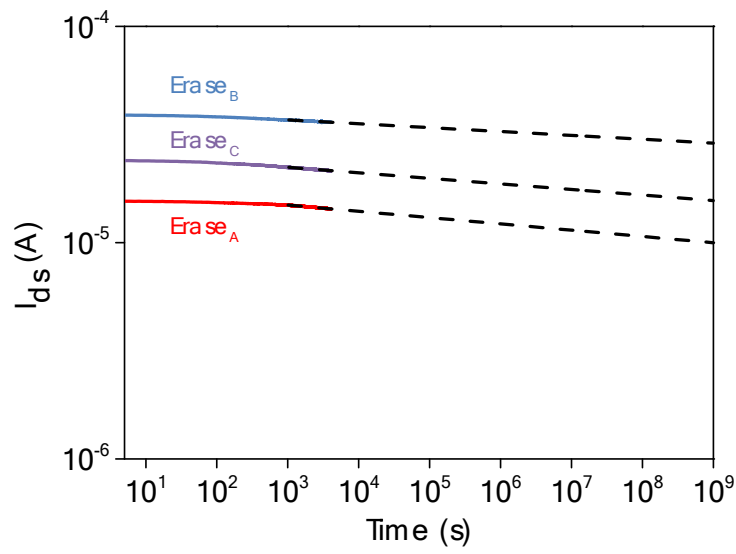

Figure S3. Projected retention characteristics of three on-state current of the  $\text{ReS}_2$  memory device.

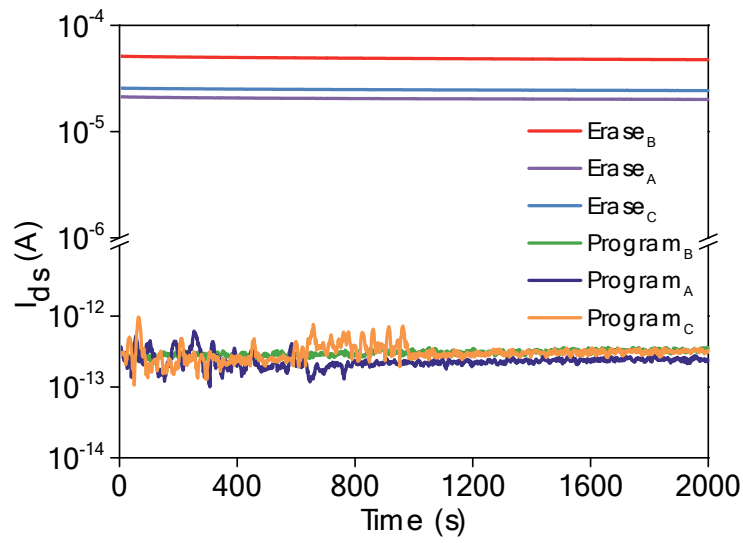

Figure S4. Retention characteristics of a  $\text{ReS}_2$  memory device for retention characteristic test.

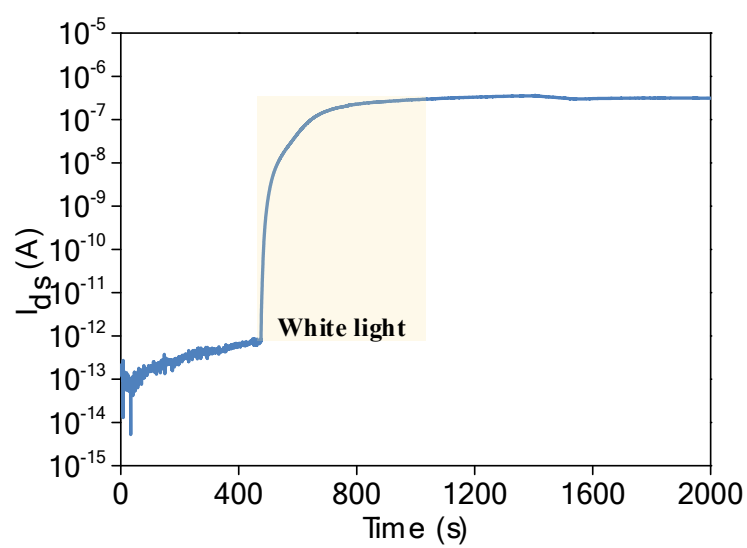

Figure S5. The effect of white light on the off-state current of the memory.
